# Supplementary material for: Ground-based aerosol climatology of China: aerosol optical depths from the China Aerosol Remote Sensing Network (CARSNET) 2002–2013
Source: Copernicus journal article supplement (doi:10.5194/acp-15-7619-2015), 2015-07-14
Supplement: Supplementary file [file acp-15-7619-2015-supplement.pdf]

Supplement of Atmos. Chem. Phys., 15, 7619–7652, 2015  
<http://www.atmos-chem-phys.net/15/7619/2015/>  
doi:10.5194/acp-15-7619-2015-supplement  
© Author(s) 2015. CC Attribution 3.0 License.

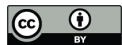

Atmospheric  
Chemistry  
and Physics  
Open Access

The logo for the journal Atmospheric Chemistry and Physics, featuring the letters 'EG' inside a circular frame with a crosshair.

*Supplement of*

## **Ground-based aerosol climatology of China: aerosol optical depths from the China Aerosol Remote Sensing Network (CARSNET) 2002–2013**

**H. Che et al.**

*Correspondence to:* H. Che (chehz@cams.cma.gov.cn) and X.-Y. Zhang (xiaoye@cams.cma.gov.cn)

The copyright of individual parts of the supplement might differ from the CC-BY 3.0 licence.

## Appendix

### 1 Site information for the 50 CARSNET sites used in this study

| No.                                                                        | Site Name   | Long. | Lat.   | Alt.   | Site information                                                                         | Obs. days |
|----------------------------------------------------------------------------|-------------|-------|--------|--------|------------------------------------------------------------------------------------------|-----------|
| Remote sites (4 sites)                                                     |             |       |        |        |                                                                                          |           |
| 1                                                                          | Akedala     | 47.12 | 87.97  | 562.0  | 55 km west of Fuhai county, Xinjiang province, and 250–300 km southeast of Kazakestan.   | 464       |
| 2                                                                          | Lhasa       | 29.67 | 91.13  | 3663.0 | In the center of Lhasa city, Qinghai-Xizang Plateau.                                     | 830       |
| 3                                                                          | Mt.Waliguan | 36.28 | 100.92 | 3810.0 | In the east edge of Qinghai-Xizang Plateau, Qinghai Province, Global GAW station         | 470       |
| 4                                                                          | Shangri-La  | 28.02 | 99.73  | 3583.0 | 12 km northeast of Shangri-La county (Diqing area, Yunnan province, China)               | 701       |
| Rural sites near the northern and northwestern deserts of China (11 sites) |             |       |        |        |                                                                                          |           |
| 5                                                                          | Dunhuang    | 40.15 | 94.68  | 1139.0 | 1.5 km northeast of Dunhuang city, Gansu province; near Kumutage Desert of China         | 2370      |
| 6                                                                          | Ejina       | 41.95 | 101.07 | 940.5  | West of Inner-Mongolia Province, near Mongolia and Badanjilin desert                     | 2250      |
| 7                                                                          | Hami        | 42.82 | 93.52  | 737.0  | 500 km east from Urumuqi, In Hami county, nearby the Gobi desert, Xinjiang Province      | 685       |
| 8                                                                          | Hotan       | 37.13 | 79.93  | 1374.7 | South edge of Takilamakan Desert, 1000 km south from Urumuqi, Xinjiang Province          | 612       |
| 9                                                                          | Jiuquan     | 39.77 | 98.48  | 1477.3 | 5 km north of Jiuquan City, Gansu Province, nearby the Badanjilin Desert                 | 412       |
| 10                                                                         | Minqin      | 38.63 | 103.08 | 1367.0 | In Minqin county, east to Tenggeli desert and north to Badanjilin Desert, Gansu Province | 1435      |
| 11                                                                         | Tazhong     | 39.00 | 83.67  | 1099.4 | In the middle of Takilamakan Desert, Xinjiang Province                                   | 1984      |
| 12                                                                         | Ulate       | 41.57 | 108.52 | 1288.0 | Northwest of Inner-Mongolia, but in grass desertification region                         | 712       |
| 13                                                                         | Xilinhot    | 43.95 | 116.12 | 1003.0 | 5 km southeast of Xilinhot City, Inner-Mongolia Province, and near Hunshandake sand-land | 2228      |
| 14                                                                         | Zhangbei    | 41.15 | 114.70 | 1093.4 | 40 km north of Zhangjiakou City Hebei Province, and near Hunshandake sand-land           | 219       |
| 15                                                                         | Zhurihe     | 42.40 | 112.90 | 1152.0 | In the middle of Inner Mongolia Province, and nearby Hunshandake sand-land               | 365       |
| Rural sites on or near the Chinese Loess Plateau (4 sites)                 |             |       |        |        |                                                                                          |           |
| 16                                                                         | Dongsheng   | 39.83 | 109.98 | 1460.5 | In the center of Erdos city, Inner Mongolia province.                                    | 234       |
| 17                                                                         | Mt.Gaolan   | 36.00 | 103.85 | 2161.6 | 5 km north from Lanzhou city, Gansu province.                                            | 766       |
| 18                                                                         | Yanan       | 36.60 | 109.50 | 958.5  | 2 km northeast of Yan'an city, Shaanxi Province                                          | 218       |
| 19                                                                         | Yulin       | 38.43 | 109.20 | 1135.0 | 10 km north of Yulin city, Shaanxi province                                              | 451       |
| Rural sites in eastern China (10 sites)                                    |             |       |        |        |                                                                                          |           |
| 20                                                                         | Changde     | 29.17 | 111.70 | 565.0  | 18 km northwest from Changde city, Hunan province.                                       | 210       |
| 21                                                                         | Dongtan     | 31.52 | 121.96 | 10.0   | In the Chongmin Island, 30 km east of Shanghai city                                      | 374       |
| 22                                                                         | Gucheng     | 39.13 | 115.80 | 45.2   | Within area of rapid urbanization, 38 km southwest of Baoding city, Hebei province.      | 750       |
| 23                                                                         | Huimin      | 37.48 | 117.53 | 11.7   | 100 km Northeast of Jinan City, Shandong Province                                        | 851       |
| 24                                                                         | Lin'an      | 30.30 | 119.73 | 138.6  | 150 km northeast of Shanghai, and 50 km west of Hangzhou city, Zhejiang province         | 1029      |
| 25                                                                         | Mt.Longfeng | 44.73 | 127.60 | 330.5  | In Wuchang county, 175 km northeast of Harbin city, Heilongjiang Province                | 1357      |
| 26                                                                         | Mt.Tai      | 36.25 | 117.10 | 1591.0 | At summit of Mt. Tai, middle of northern China Plain, Shandong Province                  | 173       |
| 27                                                                         | Shangdianzi | 40.65 | 117.12 | 293.0  | In Miyun county, 150 km northeast to Beijing city.                                       | 2042      |
| 28                                                                         | Tongyu      | 44.42 | 122.87 | 151.0  | In Tongyu county, west of Jilin Province                                                 | 738       |
| 29                                                                         | Yushe       | 37.07 | 112.98 | 1041.5 | 1.5 km east of Yushe county, Shanxi Province                                             | 1045      |
| Urban sites (21 sites)                                                     |             |       |        |        |                                                                                          |           |
| 30                                                                         | Anshan      | 41.08 | 123.00 | 23.0   | In the center of Anshan city, Liaoning province.                                         | 230       |
| 31                                                                         | Beijing     | 39.80 | 116.47 | 31.3   | In the southeast of Beijing center at city margin                                        | 1594      |
| 32                                                                         | Benxi       | 41.32 | 123.78 | 183.0  | In the center of Benxi city, Liaoning province.                                          | 376       |
| 33                                                                         | Chengdu     | 30.65 | 104.03 | 496.0  | In the center of Chengdu city, Sichuan province.                                         | 212       |

|    |           |       |        |        |                                                                                                |      |
|----|-----------|-------|--------|--------|------------------------------------------------------------------------------------------------|------|
| 34 | Dalian    | 38.90 | 121.63 | 91.5   | Southeast of Dalian center at city margin, Liaoning Province                                   | 763  |
| 35 | Datong    | 40.10 | 113.33 | 1067.3 | 9 km of Datong Cinty, but within area of rapid urbanization, Shanxi Province                   | 2269 |
| 36 | Fushu     | 41.88 | 123.95 | 80.0   | In the center of Fushun city, Liaoning province.                                               | 242  |
| 37 | Hangzhou  | 30.23 | 120.17 | 42.0   | In the center of Hangzhou city, Zhengjiang province.                                           | 365  |
| 38 | Hefei     | 31.98 | 116.38 | 92.0   | In the center of Hefei city, Anhui province.                                                   | 293  |
| 39 | Kunming   | 25.01 | 102.65 | 1889.0 | In the west region of Kunming city, Yunnan province                                            | 301  |
| 40 | Lanzhou   | 36.05 | 103.88 | 1517.3 | In the center of Lanzhou city, Gansu province.                                                 | 2157 |
| 41 | Nanjing   | 32.05 | 118.77 | 99.3   | In the center of Nanjing city, Jiangsu province                                                | 128  |
| 42 | Nanning   | 22.82 | 108.35 | 172.0  | In Nanning city, Guangxi province                                                              | 390  |
| 43 | Panyu     | 23    | 113.35 | 145.0  | In Panyu district of Guangzhou city, Guangdong Province                                        | 142  |
| 44 | Pudong    | 31.22 | 121.55 | 14.0   | In Pudong district of Shanghai city                                                            | 317  |
| 45 | Shenyang  | 41.77 | 123.50 | 60.0   | In the center of Shenyang city, Liaoning province.                                             | 477  |
| 46 | Tianjin   | 39.10 | 117.17 | 3.3    | In the center of Tianjin City.                                                                 | 1452 |
| 47 | Urumqi    | 43.78 | 87.62  | 935.0  | In the center of Urumuqi city, Xijiang province                                                | 1624 |
| 48 | Xi'an     | 34.43 | 108.97 | 363.0  | 20 km north of center of Xian city, but within Jing RiverIndustrial District, Shaanxi province | 569  |
| 49 | Yinchuan  | 38.48 | 106.22 | 1111.5 | In the center of Yinchuan city, Ningxia province.                                              | 273  |
| 50 | Zhengzhou | 34.78 | 113.68 | 99.0   | In the center of Zhengzhou city, Henan province.                                               | 915  |

## 2 Data for Figs. 2–3

| No. | Name      | AOD    |        |        |      |        | Alpha  |        |        |      |        |
|-----|-----------|--------|--------|--------|------|--------|--------|--------|--------|------|--------|
|     |           | Annual | Spring | Summer | Fall | Winter | Annual | Spring | Summer | Fall | Winter |
| 1   | Akedala   | 0.20   | 0.21   | 0.23   | 0.15 | 0.22   | 1.13   | 0.92   | 1.12   | 1.13 | 1.33   |
| 2   | Anshan    | 0.70   | 0.77   | 0.82   | 0.62 | 0.58   | 0.79   | 0.83   | 0.85   | 0.96 | 0.96   |
| 3   | Beijing   | 0.76   | 0.83   | 0.92   | 0.63 | 0.65   | 1.01   | 0.85   | 1.15   | 1.08 | 0.97   |
| 4   | Benxi     | 0.85   | 0.82   | 1.03   | 0.65 | 1.03   | 0.52   | 0.62   | 0.61   | 0.76 | 0.59   |
| 5   | Changde   | 0.59   | 0.63   | 0.44   | 0.61 | 0.69   | 1.18   | 0.89   | 1.31   | 1.35 | 1.18   |
| 6   | Chengdu   | 0.98   | 1.08   | 0.99   | 0.68 | 1.16   | 1.09   | 0.96   | 1.17   | 1.14 | 1.09   |
| 7   | Dalian    | 0.54   | 0.64   | 0.68   | 0.50 | 0.40   | 1.13   | 1.12   | 1.24   | 1.27 | 0.98   |
| 8   | Datong    | 0.51   | 0.49   | 0.57   | 0.44 | 0.52   | 0.84   | 0.68   | 0.93   | 0.89 | 0.87   |
| 9   | Dongsheng | 0.46   | 0.50   | 0.61   | 0.38 | 0.34   | 0.79   | 0.56   | 1.03   | 0.78 | 0.79   |
| 10  | Dongtan   | 0.62   | 0.62   | 0.67   | 0.49 | 0.69   | 1.13   | 1.08   | 1.24   | 1.11 | 1.11   |
| 11  | Dunhuang  | 0.32   | 0.48   | 0.32   | 0.21 | 0.28   | 0.46   | 0.29   | 0.40   | 0.55 | 0.59   |
| 12  | Ejina     | 0.25   | 0.36   | 0.27   | 0.18 | 0.18   | 0.57   | 0.37   | 0.56   | 0.68 | 0.67   |
| 13  | Fushu     | 0.49   | 0.49   | 0.55   | 0.47 | 0.44   | 0.84   | 0.85   | 0.93   | 0.94 | 0.94   |
| 14  | Gucheng   | 0.70   | 0.73   | 0.72   | 0.69 | 0.68   | 1.24   | 1.11   | 1.28   | 1.31 | 1.27   |
| 15  | Hami      | 0.25   | 0.31   | 0.24   | 0.20 | 0.26   | 0.62   | 0.54   | 0.71   | 0.57 | 0.66   |
| 16  | Hangzhou  | 1.01   | 1.07   | 0.88   | 1.02 | 1.07   | 1.24   | 1.17   | 1.24   | 1.31 | 1.24   |
| 17  | Hefei     | 0.83   | 0.89   | 0.82   | 0.77 | 0.85   | 1.19   | 0.99   | 1.23   | 1.29 | 1.26   |
| 18  | Hotan     | 0.61   | 0.75   | 0.75   | 0.37 | 0.51   | 0.22   | 0.09   | 0.10   | 0.30 | 0.48   |
| 19  | Huimin    | 0.71   | 0.74   | 0.79   | 0.66 | 0.65   | 1.14   | 0.96   | 1.25   | 1.27 | 1.09   |
| 20  | Jiuquan   | 0.31   | 0.43   | 0.29   | 0.21 | 0.30   | 0.50   | 0.39   | 0.48   | 0.49 | 0.65   |
| 21  | Jurih     | 0.24   | 0.29   | 0.36   | 0.18 | 0.14   | 0.80   | 0.57   | 0.83   | 0.80 | 1.01   |

|    |             |      |      |      |      |      |      |      |      |      |      |
|----|-------------|------|------|------|------|------|------|------|------|------|------|
| 22 | Kunming     | 0.41 | 0.53 | 0.57 | 0.35 | 0.18 | 1.24 | 1.33 | 0.98 | 1.19 | 1.48 |
| 23 | Lanzhou     | 0.80 | 0.79 | 0.59 | 0.80 | 1.01 | 0.92 | 0.64 | 0.98 | 1.06 | 0.98 |
| 24 | Lhasa       | 0.11 | 0.16 | 0.12 | 0.09 | 0.09 | 0.89 | 0.67 | 1.01 | 1.10 | 0.78 |
| 25 | Lin'an      | 0.78 | 0.80 | 0.75 | 0.79 | 0.77 | 1.27 | 1.10 | 1.32 | 1.39 | 1.29 |
| 26 | Minqin      | 0.39 | 0.46 | 0.44 | 0.35 | 0.29 | 0.54 | 0.37 | 0.51 | 0.58 | 0.68 |
| 27 | Mt.Gaolan   | 0.46 | 0.55 | 0.41 | 0.43 | 0.46 | 0.78 | 0.59 | 0.86 | 0.85 | 0.83 |
| 28 | Mt.Longfeng | 0.34 | 0.40 | 0.34 | 0.29 | 0.31 | 1.38 | 1.32 | 1.44 | 1.42 | 1.35 |
| 29 | Mt.Tai      | 0.33 | 0.36 | 0.51 | 0.29 | 0.17 | 1.05 | 0.74 | 1.16 | 1.14 | 1.18 |
| 30 | Mt.Waliguan | 0.14 | 0.21 | 0.17 | 0.09 | 0.09 | 0.59 | 0.34 | 0.75 | 0.72 | 0.54 |
| 31 | Nanjing     | 0.89 | 0.90 | 1.24 | 0.69 | 0.73 | 1.24 | 1.03 | 1.32 | 1.35 | 1.28 |
| 32 | Nanning     | 0.82 | 0.99 | 0.73 | 0.82 | 0.74 | 1.50 | 1.45 | 1.41 | 1.58 | 1.57 |
| 33 | Panyu       | 0.78 | 0.96 | 0.53 | 0.81 | 0.81 | 1.36 | 1.37 | 1.30 | 1.42 | 1.35 |
| 34 | Pudong      | 0.80 | 0.89 | 0.99 | 0.64 | 0.68 | 1.26 | 1.12 | 1.27 | 1.34 | 1.30 |
| 35 | Shangdianzi | 0.48 | 0.55 | 0.63 | 0.42 | 0.33 | 1.11 | 0.96 | 1.20 | 1.17 | 1.10 |
| 36 | Shangri-La  | 0.11 | 0.13 | 0.15 | 0.09 | 0.06 | 1.26 | 1.16 | 1.28 | 1.39 | 1.19 |
| 37 | Shenyang    | 0.76 | 0.80 | 0.86 | 0.59 | 0.79 | 0.88 | 0.90 | 0.98 | 1.05 | 0.84 |
| 38 | Tazhong     | 0.54 | 0.81 | 0.66 | 0.34 | 0.33 | 0.29 | 0.10 | 0.15 | 0.38 | 0.51 |
| 39 | Tianjin     | 0.74 | 0.78 | 0.89 | 0.67 | 0.64 | 1.08 | 0.92 | 1.17 | 1.16 | 1.07 |
| 40 | Tongyu      | 0.26 | 0.33 | 0.32 | 0.23 | 0.16 | 1.35 | 1.14 | 1.20 | 1.26 | 1.79 |
| 41 | Ulate       | 0.28 | 0.34 | 0.36 | 0.21 | 0.23 | 0.75 | 0.64 | 0.86 | 0.73 | 0.77 |
| 42 | Urumqi      | 0.47 | 0.48 | 0.27 | 0.39 | 0.73 | 0.96 | 0.81 | 0.94 | 1.01 | 1.08 |
| 43 | Xi'an       | 0.90 | 0.89 | 0.98 | 0.83 | 0.90 | 0.89 | 0.70 | 1.02 | 0.94 | 0.92 |
| 44 | Xilinhot    | 0.26 | 0.32 | 0.33 | 0.19 | 0.19 | 0.79 | 0.75 | 0.88 | 0.79 | 0.75 |
| 45 | Yanan       | 0.37 | 0.38 | 0.41 | 0.37 | 0.34 | 0.89 | 0.63 | 1.01 | 1.04 | 0.87 |
| 46 | Yinchuan    | 0.52 | 0.56 | 0.53 | 0.49 | 0.50 | 0.87 | 0.66 | 0.98 | 0.90 | 0.93 |
| 47 | Yulin       | 0.38 | 0.41 | 0.50 | 0.27 | 0.34 | 0.82 | 0.60 | 0.93 | 0.96 | 0.79 |

|    |           |      |      |      |      |      |      |      |      |      |      |
|----|-----------|------|------|------|------|------|------|------|------|------|------|
| 48 | Yushe     | 0.58 | 0.57 | 0.77 | 0.49 | 0.48 | 1.02 | 0.79 | 1.19 | 1.09 | 1.04 |
| 49 | Zhangbei  | 0.30 | 0.33 | 0.36 | 0.30 | 0.24 | 0.56 | 0.50 | 0.64 | 0.58 | 0.52 |
| 50 | Zhengzhou | 0.94 | 0.94 | 1.08 | 0.87 | 0.87 | 1.10 | 0.85 | 1.23 | 1.20 | 1.10 |

---

### 3. Data of Figs. 5–15

#### 3.1 AOD

|    | Site        | AOD   | Jan  | Feb  | Mar  | Apr  | May  | Jun  | Jul  | Aug  | Sep  | Oct  | Nov  | Dec  |
|----|-------------|-------|------|------|------|------|------|------|------|------|------|------|------|------|
| 1  | Akedala     | Mean  | 0.16 | 0.28 | 0.24 | 0.21 | 0.17 | 0.20 | 0.33 | 0.15 | 0.16 | 0.12 | 0.16 | 0.20 |
|    |             | Stdev | 0.15 | 0.19 | 0.15 | 0.09 | 0.05 | 0.12 | 0.29 | 0.07 | 0.14 | 0.06 | 0.16 | 0.09 |
| 2  | Lhasa       | Mean  | 0.08 | 0.12 | 0.15 | 0.18 | 0.14 | 0.13 | 0.12 | 0.11 | 0.10 | 0.08 | 0.08 | 0.08 |
|    |             | Stdev | 0.02 | 0.09 | 0.05 | 0.08 | 0.06 | 0.05 | 0.06 | 0.03 | 0.03 | 0.03 | 0.02 | 0.02 |
| 3  | Mt.Waliguan | Mean  | 0.09 | 0.13 | 0.24 | 0.23 | 0.18 | 0.18 | 0.19 | 0.16 | 0.12 | 0.10 | 0.06 | 0.05 |
|    |             | Stdev | 0.07 | 0.08 | 0.19 | 0.16 | 0.10 | 0.09 | 0.06 | 0.06 | 0.06 | 0.04 | 0.03 | 0.04 |
| 4  | Shangri-La  | Mean  | 0.06 | 0.07 | 0.17 | 0.13 | 0.10 | 0.08 | 0.17 | 0.19 | 0.14 | 0.08 | 0.07 | 0.05 |
|    |             | Stdev | 0.03 | 0.03 | 0.09 | 0.08 | 0.07 | 0.03 | 0.11 | 0.02 | 0.05 | 0.04 | 0.03 | 0.02 |
| 5  | Ejina       | Mean  | 0.18 | 0.21 | 0.34 | 0.39 | 0.35 | 0.29 | 0.26 | 0.27 | 0.23 | 0.16 | 0.14 | 0.16 |
|    |             | Stdev | 0.10 | 0.15 | 0.26 | 0.30 | 0.31 | 0.29 | 0.19 | 0.24 | 0.22 | 0.16 | 0.08 | 0.10 |
| 6  | Zhurihe     | Mean  | 0.11 | 0.17 | 0.17 | 0.27 | 0.42 | 0.49 | 0.34 | 0.27 | 0.22 | 0.18 | 0.13 | 0.13 |
|    |             | Stdev | 0.05 | 0.14 | 0.06 | 0.15 | 0.27 | 0.43 | 0.18 | 0.18 | 0.20 | 0.14 | 0.12 | 0.10 |
| 7  | Hami        | Mean  | 0.27 | 0.29 | 0.35 | 0.30 | 0.28 | 0.34 | 0.19 | 0.18 | 0.18 | 0.21 | 0.22 | 0.23 |
|    |             | Stdev | 0.17 | 0.14 | 0.20 | 0.21 | 0.15 | 0.30 | 0.11 | 0.09 | 0.09 | 0.12 | 0.09 | 0.11 |
| 8  | Xilinhot    | Mean  | 0.22 | 0.18 | 0.26 | 0.33 | 0.39 | 0.39 | 0.32 | 0.28 | 0.23 | 0.18 | 0.16 | 0.18 |
|    |             | Stdev | 0.17 | 0.08 | 0.18 | 0.22 | 0.26 | 0.30 | 0.23 | 0.20 | 0.19 | 0.12 | 0.09 | 0.14 |
| 9  | Wulate      | Mean  | 0.23 | 0.24 | 0.30 | 0.33 | 0.39 | 0.44 | 0.35 | 0.28 | 0.24 | 0.21 | 0.19 | 0.21 |
|    |             | Stdev | 0.14 | 0.12 | 0.18 | 0.18 | 0.26 | 0.39 | 0.24 | 0.20 | 0.15 | 0.13 | 0.09 | 0.14 |
| 10 | Zhangbei    | Mean  | 0.18 | 0.20 | 0.25 | 0.32 | 0.41 | 0.45 | 0.27 | 0.35 | 0.32 | 0.27 |      | 0.33 |
|    |             | Stdev | 0.12 | 0.14 | 0.13 | 0.12 | 0.21 | 0.26 | 0.13 | 0.29 | 0.21 | 0.15 |      | 0.41 |
| 11 | Jiuquan     | Mean  | 0.28 | 0.39 | 0.36 | 0.55 | 0.36 | 0.33 | 0.27 | 0.28 | 0.24 | 0.23 | 0.17 | 0.24 |
|    |             | Stdev | 0.11 | 0.26 | 0.22 | 0.40 | 0.23 | 0.19 | 0.09 | 0.15 | 0.10 | 0.11 | 0.04 | 0.13 |
| 12 | Dunhuang    | Mean  | 0.26 | 0.33 | 0.48 | 0.55 | 0.41 | 0.35 | 0.34 | 0.25 | 0.23 | 0.21 | 0.20 | 0.25 |

|    |              |       |      |      |      |      |      |      |      |      |      |      |      |      |
|----|--------------|-------|------|------|------|------|------|------|------|------|------|------|------|------|
|    |              | Stdev | 0.17 | 0.20 | 0.33 | 0.41 | 0.24 | 0.22 | 0.23 | 0.19 | 0.12 | 0.11 | 0.09 | 0.14 |
| 13 | Minqin       | Mean  | 0.26 | 0.35 | 0.48 | 0.48 | 0.43 | 0.43 | 0.45 | 0.44 | 0.39 | 0.36 | 0.29 | 0.27 |
|    |              | Stdev | 0.18 | 0.23 | 0.31 | 0.27 | 0.22 | 0.25 | 0.26 | 0.23 | 0.18 | 0.14 | 0.13 | 0.14 |
| 14 | Tazhong      | Mean  | 0.30 | 0.44 | 0.75 | 0.91 | 0.77 | 0.73 | 0.64 | 0.61 | 0.51 | 0.30 | 0.22 | 0.26 |
|    |              | Stdev | 0.23 | 0.24 | 0.40 | 0.46 | 0.37 | 0.33 | 0.32 | 0.29 | 0.26 | 0.16 | 0.16 | 0.17 |
| 15 | Hotan        | Mean  | 0.45 | 0.71 | 0.71 | 0.74 | 0.81 | 0.72 | 0.72 | 0.81 | 0.60 | 0.43 | 0.31 | 0.37 |
|    |              | Stdev | 0.27 | 0.42 | 0.43 | 0.45 | 0.48 | 0.43 | 0.48 | 0.39 | 0.36 | 0.28 | 0.12 | 0.10 |
| 16 | Dongsheng    | Mean  | 0.29 | 0.41 | 0.47 | 0.55 | 0.47 | 0.72 | 0.55 | 0.56 | 0.52 | 0.36 | 0.26 | 0.31 |
|    |              | Stdev | 0.15 | 0.22 | 0.35 | 0.24 | 0.22 | 0.44 | 0.28 | 0.29 | 0.32 | 0.19 | 0.08 | 0.15 |
| 17 | Yulin        | Mean  | 0.33 | 0.42 | 0.39 | 0.45 | 0.39 | 0.49 | 0.49 | 0.54 | 0.37 | 0.21 | 0.23 | 0.26 |
|    |              | Stdev | 0.27 | 0.26 | 0.28 | 0.26 | 0.15 | 0.29 | 0.28 | 0.29 | 0.27 | 0.14 | 0.20 | 0.18 |
| 18 | Yan'an       | Mean  | 0.38 | 0.38 | 0.35 | 0.43 | 0.38 | 0.44 | 0.39 | 0.39 | 0.46 | 0.39 | 0.25 | 0.26 |
|    |              | Stdev | 0.24 | 0.24 | 0.16 | 0.24 | 0.17 | 0.27 | 0.18 | 0.20 | 0.35 | 0.26 | 0.11 | 0.12 |
| 19 | Mt. Gaolan   | Mean  | 0.45 | 0.55 | 0.58 | 0.59 | 0.49 | 0.42 | 0.40 | 0.41 | 0.46 | 0.45 | 0.38 | 0.38 |
|    |              | Stdev | 0.21 | 0.24 | 0.28 | 0.26 | 0.22 | 0.17 | 0.19 | 0.18 | 0.20 | 0.14 | 0.12 | 0.21 |
| 20 | Yushe        | Mean  | 0.53 | 0.52 | 0.52 | 0.62 | 0.55 | 0.69 | 0.75 | 0.86 | 0.71 | 0.39 | 0.37 | 0.40 |
|    |              | Stdev | 0.39 | 0.34 | 0.32 | 0.34 | 0.32 | 0.42 | 0.37 | 0.42 | 0.46 | 0.26 | 0.30 | 0.33 |
| 21 | Changde      | Mean  | 0.82 | 0.73 | 0.82 | 0.58 | 0.49 | 0.45 | 0.40 | 0.47 | 0.70 | 0.56 | 0.57 | 0.51 |
|    |              | Stdev | 0.35 | 0.26 | 0.47 | 0.23 | 0.24 | 0.24 | 0.21 | 0.22 | 0.37 | 0.44 | 0.24 | 0.30 |
| 22 | Mt. Longfeng | Mean  | 0.32 | 0.31 | 0.32 | 0.46 | 0.41 | 0.42 | 0.30 | 0.30 | 0.27 | 0.32 | 0.29 | 0.30 |
|    |              | Stdev | 0.22 | 0.22 | 0.24 | 0.29 | 0.21 | 0.29 | 0.23 | 0.23 | 0.25 | 0.26 | 0.20 | 0.21 |
| 23 | Mt. Tai      | Mean  | 0.15 | 0.28 | 0.28 | 0.37 | 0.42 | 0.58 | 0.51 | 0.43 | --   | 0.15 | 0.16 | 0.09 |
|    |              | Stdev | 0.14 | 0.20 | 0.24 | 0.23 | 0.19 | 0.34 | 0.31 | 0.22 | --   | 0.08 | 0.19 | 0.05 |
| 24 | Dongtan      | Mean  | 0.64 | 0.83 | 0.70 | 0.64 | 0.51 | 0.67 | 0.58 | 0.78 | 0.40 | 0.44 | 0.62 | 0.59 |
|    |              | Stdev | 0.37 | 0.43 | 0.32 | 0.22 | 0.19 | 0.50 | 0.45 | 0.39 | 0.21 | 0.23 | 0.30 | 0.27 |
| 25 | Shangdianzi  | Mean  | 0.32 | 0.37 | 0.49 | 0.57 | 0.58 | 0.72 | 0.56 | 0.60 | 0.51 | 0.43 | 0.34 | 0.31 |



|    |          |       |      |      |      |      |      |      |      |      |      |      |      |      |
|----|----------|-------|------|------|------|------|------|------|------|------|------|------|------|------|
|    |          | Stdev | 0.35 | 0.39 | 0.45 | 0.43 | 0.39 | 0.59 | 0.51 | 0.45 | 0.45 | 0.41 | 0.35 | 0.30 |
| 26 | Huimin   | Mean  | 0.64 | 0.72 | 0.72 | 0.81 | 0.71 | 0.90 | 0.78 | 0.70 | 0.68 | 0.69 | 0.62 | 0.61 |
|    |          | Stdev | 0.32 | 0.32 | 0.36 | 0.29 | 0.29 | 0.31 | 0.31 | 0.33 | 0.37 | 0.39 | 0.32 | 0.35 |
| 27 | Gucheng  | Mean  | 0.66 | 0.77 | 0.65 | 0.77 | 0.76 | 0.81 | 0.76 | 0.59 | 0.79 | 0.64 | 0.62 | 0.63 |
|    |          | Stdev | 0.45 | 0.47 | 0.45 | 0.45 | 0.48 | 0.53 | 0.46 | 0.34 | 0.46 | 0.48 | 0.45 | 0.38 |
| 28 | Lin'an   | Mean  | 0.83 | 0.84 | 0.81 | 0.81 | 0.78 | 0.96 | 0.58 | 0.72 | 0.90 | 0.82 | 0.65 | 0.65 |
|    |          | Stdev | 0.33 | 0.30 | 0.29 | 0.31 | 0.29 | 0.32 | 0.34 | 0.32 | 0.34 | 0.35 | 0.29 | 0.29 |
| 29 | Tongyu   | Mean  | 0.18 | 0.13 | 0.21 | 0.35 | 0.44 | 0.44 | 0.32 | 0.20 | 0.17 | 0.36 | 0.15 | 0.18 |
|    |          | Stdev | 0.16 | 0.06 | 0.19 | 0.33 | 0.44 | 0.42 | 0.26 | 0.14 | 0.14 | 0.34 | 0.13 | 0.18 |
| 30 | Urumqi   | Mean  | 0.71 | 0.85 | 0.63 | 0.44 | 0.35 | 0.27 | 0.28 | 0.26 | 0.30 | 0.35 | 0.53 | 0.65 |
|    |          | Stdev | 0.37 | 0.40 | 0.31 | 0.20 | 0.21 | 0.13 | 0.14 | 0.10 | 0.13 | 0.15 | 0.28 | 0.37 |
| 31 | Datong   | Mean  | 0.55 | 0.50 | 0.44 | 0.51 | 0.53 | 0.53 | 0.57 | 0.61 | 0.52 | 0.40 | 0.42 | 0.50 |
|    |          | Stdev | 0.32 | 0.31 | 0.25 | 0.26 | 0.32 | 0.37 | 0.41 | 0.37 | 0.33 | 0.22 | 0.20 | 0.27 |
| 32 | Yinchuan | Mean  | 0.56 | 0.42 | 0.68 | 0.47 | 0.52 | 0.48 | 0.47 | 0.64 | 0.47 | 0.43 | 0.56 | 0.51 |
|    |          | Stdev | 0.28 | 0.24 | 0.30 | 0.17 | 0.17 | 0.22 | 0.22 | 0.16 | 0.19 | 0.14 | 0.27 | 0.24 |
| 33 | Dalian   | Mean  | 0.36 | 0.44 | 0.55 | 0.63 | 0.60 | 0.67 | 0.74 | 0.62 | 0.55 | 0.51 | 0.43 | 0.41 |
|    |          | Stdev | 0.25 | 0.32 | 0.37 | 0.36 | 0.24 | 0.34 | 0.41 | 0.29 | 0.42 | 0.36 | 0.33 | 0.33 |
| 34 | Tianjin  | Mean  | 0.60 | 0.75 | 0.75 | 0.79 | 0.81 | 1.00 | 0.84 | 0.82 | 0.70 | 0.68 | 0.62 | 0.56 |
|    |          | Stdev | 0.46 | 0.49 | 0.49 | 0.45 | 0.44 | 0.57 | 0.49 | 0.49 | 0.44 | 0.48 | 0.39 | 0.37 |
| 35 | Beijing  | Mean  | 0.69 | 0.69 | 0.81 | 0.86 | 0.81 | 1.10 | 0.83 | 0.83 | 0.64 | 0.63 | 0.63 | 0.58 |
|    |          | Stdev | 0.51 | 0.47 | 0.58 | 0.49 | 0.50 | 0.48 | 0.54 | 0.49 | 0.51 | 0.53 | 0.46 | 0.45 |
| 36 | Naning   | Mean  | 0.77 | 0.72 | 1.20 | 1.02 | 0.75 | 0.60 | 0.67 | 0.91 | 0.79 | 1.04 | 0.63 | 0.74 |
|    |          | Stdev | 0.24 | 0.22 | 0.33 | 0.40 | 0.29 | 0.30 | 0.39 | 0.52 | 0.34 | 0.51 | 0.28 | 0.27 |
| 37 | Lanzhou  | Mean  | 1.03 | 0.88 | 0.88 | 0.81 | 0.68 | 0.56 | 0.59 | 0.63 | 0.68 | 0.78 | 0.93 | 1.13 |
|    |          | Stdev | 0.31 | 0.30 | 0.37 | 0.29 | 0.23 | 0.16 | 0.22 | 0.23 | 0.22 | 0.21 | 0.30 | 0.34 |
| 38 | Xi'an    | Mean  | 0.86 | 1.07 | 1.02 | 0.81 | 0.83 | 0.81 | 0.97 | 1.17 | 0.86 | 0.83 | 0.80 | 0.77 |

|    |           |       |      |      |      |      |      |      |      |      |      |      |      |      |
|----|-----------|-------|------|------|------|------|------|------|------|------|------|------|------|------|
|    |           | Stdev | 0.49 | 0.42 | 0.32 | 0.31 | 0.34 | 0.34 | 0.34 | 0.43 | 0.38 | 0.41 | 0.39 | 0.33 |
| 39 | Zhengzhou | Mean  | 0.87 | 1.04 | 1.00 | 0.91 | 0.90 | 1.08 | 1.00 | 1.14 | 0.97 | 0.91 | 0.74 | 0.70 |
|    |           | Stdev | 0.52 | 0.47 | 0.44 | 0.45 | 0.51 | 0.49 | 0.40 | 0.45 | 0.50 | 0.46 | 0.40 | 0.42 |
| 40 | Chengdu   | Mean  | 1.09 | 1.24 | 1.30 | 1.07 | 0.87 | 0.88 | 0.89 | 1.20 | 0.74 | 0.50 | 0.79 | 1.16 |
|    |           | Stdev | 0.38 | 0.49 | 0.40 | 0.39 | 0.37 | 0.30 | 0.51 | 0.38 | 0.33 | 0.19 | 0.29 | 0.36 |
| 41 | Hangzhou  | Mean  | 1.08 | 1.15 | 1.23 | 1.03 | 0.94 | 1.02 | 0.78 | 0.84 | 1.02 | 1.08 | 0.95 | 0.98 |
|    |           | Stdev | 0.50 | 0.39 | 0.47 | 0.55 | 0.34 | 0.68 | 0.69 | 0.48 | 0.48 | 0.55 | 0.44 | 0.38 |
| 42 | Pudong    | Mean  | 0.50 | 0.90 | 0.67 | 0.97 | 1.04 | 1.26 | 0.90 | 0.81 | 0.63 | 0.69 | 0.60 | 0.65 |
|    |           | Stdev | 0.27 | 0.35 | 0.34 | 0.31 | 0.59 | 0.61 | 0.53 | 0.55 | 0.40 | 0.34 | 0.30 | 0.37 |
| 43 | Hefei     | Mean  | 0.81 | 0.89 | 1.03 | 0.71 | 0.92 | 1.15 | 0.72 | 0.59 | 0.75 | 0.76 | 0.80 |      |
|    |           | Stdev | 0.22 | 0.26 | 0.28 | 0.25 | 0.21 | 0.18 | 0.34 | 0.24 | 0.25 | 0.18 | 0.40 |      |
| 44 | Kuming    | Mean  | 0.20 | 0.19 | 0.62 | 0.48 | 0.49 | 0.45 | 0.46 | 0.78 | 0.65 | 0.25 | 0.15 | 0.16 |
|    |           | Stdev | 0.09 | 0.09 | 0.28 | 0.29 | 0.26 | 0.27 | 0.27 | 0.42 | 0.48 | 0.17 | 0.08 | 0.15 |
| 45 | Panyu     | Mean  | 0.77 | 1.08 | 1.22 | 0.98 | 0.67 | 0.60 | 0.46 | 0.53 | 0.91 | 0.86 | 0.66 | 0.58 |
|    |           | Stdev | 0.25 | 0.28 | 0.36 | 0.32 | 0.26 | 0.18 | 0.35 | 0.34 | 0.42 | 0.41 | 0.25 | 0.30 |
| 46 | Nanjing   | Mean  | 0.73 | 0.72 | 1.01 | 0.84 | 0.85 | 0.98 | 1.19 | 1.55 | 0.64 | 0.60 | 0.82 | 0.73 |
|    |           | Stdev | 0.26 | 0.46 | 0.68 | 0.18 | 0.42 | 0.21 | 0.48 | 0.49 | 0.17 | 0.31 | 0.24 | 0.29 |
| 47 | Shenyang  | Mean  |      | 1.07 | 0.71 | 0.78 | 0.89 | 0.90 | 1.01 | 0.66 | 0.61 | 0.54 | 0.62 | 0.51 |
|    |           | Stdev |      | 0.40 | 0.43 | 0.34 | 0.33 | 0.50 | 0.51 | 0.43 | 0.42 | 0.40 | 0.39 | 0.32 |
| 48 | Anshan    | Mean  | 0.56 | 0.75 | 0.44 | 0.78 | 1.08 | 0.80 | 0.92 | 0.72 | 0.77 | 0.51 | 0.57 | 0.43 |
|    |           | Stdev | 0.28 | 0.41 | 0.17 | 0.36 | 0.43 | 0.41 | 0.37 | 0.40 | 0.42 | 0.31 | 0.39 | 0.14 |
| 49 | Benxi     | Mean  |      | 1.03 | 0.81 | 0.75 | 0.91 | 1.12 | 1.13 | 0.84 | 0.82 | 0.67 | 0.46 |      |
|    |           | Stdev |      | 0.32 | 0.34 | 0.28 | 0.41 | 0.42 | 0.37 | 0.34 | 0.50 | 0.36 | 0.07 |      |
| 50 | Fushun    | Mean  | 0.60 | 0.26 |      | 0.49 | 0.50 | 0.41 | 0.66 | 0.59 | 0.45 | 0.40 | 0.55 | 0.48 |
|    |           | Stdev | 0.42 | 0.13 |      | 0.21 | 0.31 | 0.22 | 0.41 | 0.44 | 0.39 | 0.18 | 0.33 | 0.25 |

### 3.2 Alpha

|    | Site        | Alpha | Jan  | Feb  | Mar  | Apr  | May  | Jun  | Jul  | Aug  | Sep  | Oct  | Nov  | Dec  |
|----|-------------|-------|------|------|------|------|------|------|------|------|------|------|------|------|
| 1  | Akedala     | Mean  | 1.45 | 1.23 | 0.90 | 1.00 | 0.88 | 0.96 | 1.18 | 1.24 | 1.02 | 1.20 | 1.19 | 1.32 |
|    |             | Stdev | 0.39 | 0.37 | 0.67 | 0.31 | 0.26 | 0.28 | 0.24 | 0.22 | 0.35 | 0.44 | 0.46 | 0.39 |
| 2  | Lhasa       | Mean  | 0.80 | 0.62 | 0.53 | 0.73 | 0.76 | 0.85 | 0.94 | 1.22 | 1.16 | 1.07 | 1.08 | 0.92 |
|    |             | Stdev | 0.32 | 0.25 | 0.20 | 0.24 | 0.23 | 0.27 | 0.32 | 0.35 | 0.25 | 0.26 | 0.22 | 0.27 |
| 3  | Mt.Waliguan | Mean  | 0.61 | 0.36 | 0.25 | 0.35 | 0.40 | 0.56 | 0.96 | 0.74 | 0.65 | 0.77 | 0.75 | 0.65 |
|    |             | Stdev | 0.33 | 0.23 | 0.14 | 0.22 | 0.33 | 0.26 | 0.38 | 0.32 | 0.24 | 0.27 | 0.28 | 0.33 |
| 4  | Shangri-La  | Mean  | 1.16 | 1.22 | 1.20 | 1.19 | 1.09 | 1.27 | 1.49 | 1.08 | 1.34 | 1.50 | 1.33 | 1.20 |
|    |             | Stdev | 0.36 | 0.33 | 0.37 | 0.33 | 0.41 | 0.39 | 0.27 | 0.29 | 0.39 | 0.44 | 0.41 | 0.44 |
| 5  | Ejina       | Mean  | 0.73 | 0.56 | 0.35 | 0.35 | 0.39 | 0.49 | 0.58 | 0.61 | 0.68 | 0.64 | 0.73 | 0.72 |
|    |             | Stdev | 0.37 | 0.34 | 0.27 | 0.25 | 0.26 | 0.29 | 0.32 | 0.32 | 0.34 | 0.29 | 0.33 | 0.37 |
| 6  | Zhurihe     | Mean  | 1.08 | 0.80 | 0.48 | 0.42 | 0.80 | 0.87 | 0.87 | 0.73 | 0.75 | 0.70 | 0.94 | 1.15 |
|    |             | Stdev | 0.28 | 0.40 | 0.19 | 0.30 | 0.45 | 0.35 | 0.35 | 0.51 | 0.36 | 0.38 | 0.44 | 0.30 |
| 7  | Hami        | Mean  | 0.86 | 0.51 | 0.39 | 0.50 | 0.72 | 0.68 | 0.75 | 0.71 | 0.71 | 0.55 | 0.45 | 0.62 |
|    |             | Stdev | 0.25 | 0.24 | 0.27 | 0.37 | 0.45 | 0.35 | 0.30 | 0.29 | 0.34 | 0.28 | 0.28 | 0.25 |
| 8  | Xilinhot    | Mean  | 0.69 | 0.74 | 0.73 | 0.75 | 0.78 | 0.86 | 0.88 | 0.89 | 0.89 | 0.76 | 0.73 | 0.82 |
|    |             | Stdev | 0.35 | 0.48 | 0.48 | 0.44 | 0.40 | 0.42 | 0.39 | 0.41 | 0.44 | 0.46 | 0.42 | 0.35 |
| 9  | Wulate      | Mean  | 0.86 | 0.62 | 0.53 | 0.48 | 0.92 | 0.89 | 0.88 | 0.81 | 0.74 | 0.71 | 0.74 | 0.84 |
|    |             | Stdev | 0.36 | 0.27 | 0.28 | 0.24 | 0.44 | 0.45 | 0.47 | 0.42 | 0.42 | 0.31 | 0.37 | 0.36 |
| 10 | Zhangbei    | Mean  | 0.56 | 0.48 | 0.48 | 0.39 | 0.62 | 0.76 | 0.62 | 0.54 | 0.66 | 0.50 |      | 0.53 |
|    |             | Stdev | 0.20 | 0.19 | 0.17 | 0.15 | 0.25 | 0.19 | 0.22 | 0.33 | 0.31 | 0.28 |      | 0.22 |
| 11 | Jiuquan     | Mean  | 0.67 | 0.59 | 0.40 | 0.31 | 0.46 | 0.51 | 0.47 | 0.46 | 0.37 | 0.47 | 0.65 | 0.68 |
|    |             | Stdev | 0.25 | 0.39 | 0.24 | 0.29 | 0.30 | 0.33 | 0.26 | 0.25 | 0.12 | 0.18 | 0.17 | 0.24 |
| 12 | Dunhuang    | Mean  | 0.65 | 0.47 | 0.27 | 0.26 | 0.33 | 0.36 | 0.38 | 0.46 | 0.50 | 0.51 | 0.65 | 0.65 |

|    |              |       |      |      |      |      |      |      |      |      |      |      |      |      |
|----|--------------|-------|------|------|------|------|------|------|------|------|------|------|------|------|
|    |              | Stdev | 0.27 | 0.30 | 0.21 | 0.22 | 0.23 | 0.23 | 0.30 | 0.28 | 0.29 | 0.24 | 0.28 | 0.33 |
| 13 | Minqin       | Mean  | 0.84 | 0.54 | 0.36 | 0.35 | 0.39 | 0.44 | 0.57 | 0.53 | 0.57 | 0.57 | 0.61 | 0.66 |
|    |              | Stdev | 0.36 | 0.31 | 0.25 | 0.21 | 0.26 | 0.23 | 0.30 | 0.25 | 0.35 | 0.32 | 0.41 | 0.40 |
| 14 | Tazhong      | Mean  | 0.61 | 0.36 | 0.12 | 0.10 | 0.10 | 0.11 | 0.15 | 0.17 | 0.21 | 0.36 | 0.56 | 0.57 |
|    |              | Stdev | 0.32 | 0.29 | 0.08 | 0.06 | 0.07 | 0.07 | 0.09 | 0.11 | 0.09 | 0.19 | 0.27 | 0.34 |
| 15 | Hotan        | Mean  | 0.66 | 0.18 | 0.13 | 0.07 | 0.06 | 0.07 | 0.15 | 0.08 | 0.11 | 0.20 | 0.39 | 0.59 |
|    |              | Stdev | 0.26 | 0.13 | 0.14 | 0.07 | 0.06 | 0.07 | 0.13 | 0.06 | 0.07 | 0.10 | 0.16 | 0.20 |
| 16 | Dongsheng    | Mean  | 0.87 | 0.69 | 0.50 | 0.44 | 0.74 | 0.91 | 0.98 | 1.21 | 0.88 | 0.73 | 0.72 | 0.81 |
|    |              | Stdev | 0.20 | 0.27 | 0.27 | 0.33 | 0.30 | 0.29 | 0.28 | 0.39 | 0.35 | 0.30 | 0.29 | 0.25 |
| 17 | Yulin        | Mean  | 0.98 | 0.59 | 0.59 | 0.67 | 0.54 | 0.64 | 0.92 | 1.25 | 1.02 | 0.93 | 0.93 | 0.80 |
|    |              | Stdev | 0.37 | 0.22 | 0.31 | 0.32 | 0.26 | 0.36 | 0.35 | 0.23 | 0.33 | 0.29 | 0.27 | 0.30 |
| 18 | Yan'an       | Mean  | 1.04 | 0.65 | 0.63 | 0.60 | 0.65 | 1.05 | 0.97 | 1.01 | 1.14 | 0.97 | 1.01 | 0.91 |
|    |              | Stdev | 0.21 | 0.28 | 0.23 | 0.28 | 0.27 | 0.24 | 0.35 | 0.15 | 0.25 | 0.25 | 0.23 | 0.29 |
| 19 | Mt. Gaolan   | Mean  | 0.94 | 0.77 | 0.64 | 0.57 | 0.56 | 0.84 | 0.88 | 0.87 | 0.79 | 0.91 | 0.86 | 0.77 |
|    |              | Stdev | 0.31 | 0.31 | 0.30 | 0.28 | 0.30 | 0.40 | 0.38 | 0.31 | 0.29 | 0.26 | 0.36 | 0.32 |
| 20 | Yushe        | Mean  | 1.05 | 1.04 | 0.78 | 0.76 | 0.82 | 1.11 | 1.20 | 1.25 | 1.20 | 1.04 | 1.02 | 1.01 |
|    |              | Stdev | 0.27 | 0.27 | 0.31 | 0.34 | 0.34 | 0.29 | 0.23 | 0.26 | 0.30 | 0.26 | 0.26 | 0.34 |
| 21 | Changde      | Mean  | 1.36 | 1.26 | 0.96 | 0.79 | 0.93 | 1.28 | 1.27 | 1.38 | 1.40 | 1.30 | 1.36 | 0.93 |
|    |              | Stdev | 0.12 | 0.20 | 0.39 | 0.25 | 0.29 | 0.11 | 0.27 | 0.30 | 0.16 | 0.24 | 0.20 | 0.23 |
| 22 | Mt. Longfeng | Mean  | 1.35 | 1.37 | 1.38 | 1.33 | 1.26 | 1.39 | 1.49 | 1.43 | 1.42 | 1.42 | 1.42 | 1.32 |
|    |              | Stdev | 0.28 | 0.34 | 0.36 | 0.36 | 0.38 | 0.30 | 0.29 | 0.26 | 0.33 | 0.35 | 0.29 | 0.29 |
| 23 | Mt. Tai      | Mean  | 1.14 | 1.06 | 1.00 | 0.79 | 0.42 | 1.30 | 1.14 | 1.03 |      | 0.98 | 1.02 | 1.34 |
|    |              | Stdev | 0.41 | 0.35 | 0.34 | 0.35 | 0.07 | 0.13 | 0.17 | 0.12 |      | 0.22 | 0.23 | 0.37 |
| 24 | Dongtan      | Mean  | 1.21 | 0.99 | 1.03 | 1.00 | 1.19 | 1.21 | 1.20 | 1.29 | 1.05 | 1.09 | 1.20 | 1.12 |
|    |              | Stdev | 0.24 | 0.34 | 0.26 | 0.26 | 0.24 | 0.28 | 0.41 | 0.23 | 0.31 | 0.28 | 0.28 | 0.32 |
| 25 | Shangdianzi  | Mean  | 1.11 | 1.11 | 1.00 | 0.92 | 0.96 | 1.17 | 1.19 | 1.25 | 1.20 | 1.18 | 1.14 | 1.08 |

|    |          |       |      |      |      |      |      |      |      |      |      |      |      |      |
|----|----------|-------|------|------|------|------|------|------|------|------|------|------|------|------|
|    |          | Stdev | 0.29 | 0.31 | 0.35 | 0.36 | 0.40 | 0.29 | 0.26 | 0.26 | 0.26 | 0.26 | 0.31 | 0.34 |
| 26 | Huimin   | Mean  | 1.16 | 1.09 | 0.97 | 0.96 | 0.95 | 1.19 | 1.25 | 1.32 | 1.33 | 1.22 | 1.26 | 1.03 |
|    |          | Stdev | 0.20 | 0.28 | 0.31 | 0.32 | 0.35 | 0.21 | 0.16 | 0.17 | 0.26 | 0.22 | 0.15 | 0.32 |
| 27 | Gucheng  | Mean  | 1.36 | 1.23 | 1.10 | 1.16 | 1.06 | 1.22 | 1.27 | 1.34 | 1.26 | 1.32 | 1.35 | 1.22 |
|    |          | Stdev | 0.26 | 0.30 | 0.37 | 0.34 | 0.32 | 0.31 | 0.24 | 0.30 | 0.34 | 0.27 | 0.26 | 0.40 |
| 28 | Lin'an   | Mean  | 1.27 | 1.30 | 1.13 | 0.97 | 1.18 | 1.24 | 1.26 | 1.44 | 1.39 | 1.38 | 1.40 | 1.29 |
|    |          | Stdev | 0.26 | 0.28 | 0.27 | 0.32 | 0.30 | 0.33 | 0.43 | 0.30 | 0.25 | 0.28 | 0.21 | 0.33 |
| 29 | Tongyu   | Mean  | 1.92 | 1.90 | 1.34 | 1.04 | 1.05 | 1.21 | 1.27 | 1.13 | 1.08 | 1.26 | 1.44 | 1.55 |
|    |          | Stdev | 0.66 | 0.55 | 0.39 | 0.38 | 0.39 | 0.32 | 0.33 | 0.29 | 0.37 | 0.42 | 0.47 | 0.64 |
| 30 | Urumqi   | Mean  | 1.08 | 1.02 | 0.91 | 0.74 | 0.78 | 0.85 | 1.05 | 0.92 | 0.91 | 0.99 | 1.13 | 1.15 |
|    |          | Stdev | 0.23 | 0.23 | 0.33 | 0.37 | 0.39 | 0.31 | 0.32 | 0.29 | 0.29 | 0.25 | 0.24 | 0.28 |
| 31 | Datong   | Mean  | 0.91 | 0.80 | 0.68 | 0.63 | 0.72 | 0.86 | 0.94 | 0.99 | 0.98 | 0.84 | 0.86 | 0.90 |
|    |          | Stdev | 0.19 | 0.25 | 0.28 | 0.32 | 0.34 | 0.33 | 0.25 | 0.25 | 0.27 | 0.25 | 0.24 | 0.22 |
| 32 | Yinchuan | Mean  | 1.04 | 0.74 | 0.56 | 0.58 | 0.85 | 0.94 | 1.02 | 0.99 | 0.78 | 0.99 | 0.93 | 1.00 |
|    |          | Stdev | 0.18 | 0.29 | 0.24 | 0.20 | 0.34 | 0.24 | 0.26 | 0.17 | 0.20 | 0.16 | 0.20 | 0.22 |
| 33 | Dalian   | Mean  | 0.95 | 0.96 | 0.94 | 1.04 | 1.11 | 1.21 | 1.25 | 1.26 | 1.24 | 1.31 | 1.26 | 1.04 |
|    |          | Stdev | 0.27 | 0.33 | 0.30 | 0.37 | 0.35 | 0.27 | 0.22 | 0.31 | 0.35 | 0.23 | 0.22 | 0.31 |
| 34 | Tianjin  | Mean  | 1.07 | 1.06 | 0.93 | 0.88 | 0.96 | 1.15 | 1.14 | 1.24 | 1.18 | 1.13 | 1.17 | 1.08 |
|    |          | Stdev | 0.30 | 0.28 | 0.30 | 0.33 | 0.34 | 0.25 | 0.25 | 0.26 | 0.30 | 0.28 | 0.32 | 0.33 |
| 35 | Beijing  | Mean  | 0.98 | 0.94 | 0.87 | 0.79 | 0.89 | 1.14 | 1.10 | 1.21 | 1.11 | 1.10 | 1.04 | 0.99 |
|    |          | Stdev | 0.34 | 0.39 | 0.34 | 0.37 | 0.33 | 0.25 | 0.29 | 0.28 | 0.26 | 0.27 | 0.32 | 0.32 |
| 36 | Naning   | Mean  | 1.62 | 1.64 | 1.50 | 1.43 | 1.42 | 1.22 | 1.37 | 1.66 | 1.63 | 1.52 | 1.59 | 1.45 |
|    |          | Stdev | 0.14 | 0.14 | 0.27 | 0.30 | 0.30 | 0.25 | 0.56 | 0.26 | 0.40 | 0.27 | 0.14 | 0.18 |
| 37 | Lanzhou  | Mean  | 1.03 | 0.86 | 0.65 | 0.58 | 0.70 | 0.92 | 1.02 | 1.01 | 1.03 | 1.04 | 1.11 | 1.05 |
|    |          | Stdev | 0.22 | 0.31 | 0.32 | 0.29 | 0.27 | 0.26 | 0.23 | 0.22 | 0.19 | 0.19 | 0.23 | 0.22 |
| 38 | Xi'an    | Mean  | 0.97 | 0.88 | 0.73 | 0.59 | 0.79 | 0.88 | 1.03 | 1.15 | 0.99 | 1.00 | 0.83 | 0.91 |

|    |           |       |      |      |      |      |      |      |      |      |      |      |      |      |
|----|-----------|-------|------|------|------|------|------|------|------|------|------|------|------|------|
|    |           | Stdev | 0.30 | 0.32 | 0.36 | 0.33 | 0.36 | 0.39 | 0.35 | 0.29 | 0.32 | 0.32 | 0.28 | 0.27 |
| 39 | Zhengzhou | Mean  | 1.15 | 1.15 | 0.82 | 0.82 | 0.91 | 1.18 | 1.25 | 1.26 | 1.24 | 1.25 | 1.12 | 0.99 |
|    |           | Stdev | 0.26 | 0.26 | 0.34 | 0.32 | 0.34 | 0.25 | 0.21 | 0.23 | 0.25 | 0.27 | 0.32 | 0.36 |
| 40 | Chengdu   | Mean  | 1.11 | 1.04 | 0.93 | 0.98 | 0.97 | 1.11 | 1.19 | 1.21 | 1.05 | 1.11 | 1.24 | 1.10 |
|    |           | Stdev | 0.20 | 0.16 | 0.32 | 0.35 | 0.28 | 0.22 | 0.20 | 0.14 | 0.25 | 0.28 | 0.16 | 0.17 |
| 41 | Hangzhou  | Mean  | 1.34 | 1.30 | 1.21 | 1.09 | 1.22 | 1.27 | 1.18 | 1.29 | 1.33 | 1.38 | 1.22 | 1.08 |
|    |           | Stdev | 0.14 | 0.21 | 0.22 | 0.20 | 0.28 | 0.20 | 0.23 | 0.19 | 0.23 | 0.15 | 0.27 | 0.38 |
| 42 | Pudong    | Mean  | 1.37 | 1.27 | 1.04 | 1.14 | 1.19 | 1.23 | 1.31 | 1.28 | 1.24 | 1.41 | 1.38 | 1.26 |
|    |           | Stdev | 0.24 | 0.22 | 0.30 | 0.25 | 0.32 | 0.23 | 0.29 | 0.23 | 0.52 | 0.17 | 0.14 | 0.31 |
| 43 | Hefei     | Mean  | 1.30 | 1.22 | 0.94 | 0.89 | 1.14 | 1.19 | 1.14 | 1.35 | 1.38 | 1.37 | 1.13 |      |
|    |           | Stdev | 0.22 | 0.26 | 0.28 | 0.25 | 0.21 | 0.18 | 0.34 | 0.24 | 0.25 | 0.18 | 0.40 |      |
| 44 | Kuming    | Mean  | 1.55 | 1.69 | 1.52 | 1.32 | 1.14 | 0.98 | 0.90 | 1.06 | 1.00 | 1.32 | 1.24 | 1.21 |
|    |           | Stdev | 0.29 | 0.19 | 0.17 | 0.18 | 0.27 | 0.36 | 0.47 | 0.23 | 0.43 | 0.16 | 0.24 | 0.25 |
| 45 | Panyu     | Mean  | 1.35 | 1.37 | 1.42 | 1.30 | 1.39 | 1.49 | 1.14 | 1.26 | 1.45 | 1.48 | 1.32 | 1.34 |
|    |           | Stdev | 0.05 | 0.04 | 0.12 | 0.21 | 0.18 | 0.13 | 0.34 | 0.26 | 0.19 | 0.11 | 0.11 | 0.17 |
| 46 | Nanjing   | Mean  | 1.29 | 1.18 | 1.09 | 1.01 | 0.99 | 1.27 | 1.35 | 1.34 | 1.34 | 1.37 | 1.34 | 1.36 |
|    |           | Stdev | 0.17 | 0.33 | 0.23 | 0.17 | 0.38 | 0.09 | 0.14 | 0.20 | 0.13 | 0.14 | 0.10 | 0.16 |
| 47 | Shenyang  | Mean  |      | 0.48 | 0.84 | 0.79 | 0.69 | 0.87 | 0.73 | 0.94 | 1.05 | 1.11 | 1.16 | 1.07 |
|    |           | Stdev |      | 0.17 | 0.45 | 0.31 | 0.28 | 0.25 | 0.27 | 0.26 | 0.23 | 0.29 | 0.18 | 0.17 |
| 48 | Anshan    | Mean  | 0.72 | 0.95 | 0.83 | 0.59 | 0.29 | 0.75 | 0.79 | 0.66 | 1.09 | 1.06 | 0.88 | 0.87 |
|    |           | Stdev | 0.51 | 0.26 | 0.24 | 0.23 | 0.15 | 0.30 | 0.18 | 0.32 | 0.20 | 0.23 | 0.31 | 0.23 |
| 49 | Benxi     | Mean  |      | 0.64 | 0.42 | 0.59 | 0.41 | 0.53 | 0.39 | 0.49 | 0.72 | 0.55 | 0.51 |      |
|    |           | Stdev |      | 0.14 | 0.26 | 0.22 | 0.14 | 0.26 | 0.21 | 0.21 | 0.35 | 0.23 | 0.15 |      |
| 50 | Fushun    | Mean  | 0.95 | 1.03 |      | 0.20 | 0.84 | 0.77 | 0.52 | 1.01 | 0.81 | 0.95 | 1.03 | 1.07 |
|    |           | Stdev | 0.22 | 0.14 |      | 0.27 | 0.36 | 0.32 | 0.69 | 0.26 | 0.26 | 0.26 | 0.25 | 0.17 |
